# Supplementary material
Source: Springer Nature journal article supplement (https://www.springermedizin.de/resource/supplementary/12889_2011_3737_MOESM1_ESM.pdf/9491310)

## Proportion of Home versus Institutional Deliveries, 2002 through 2008

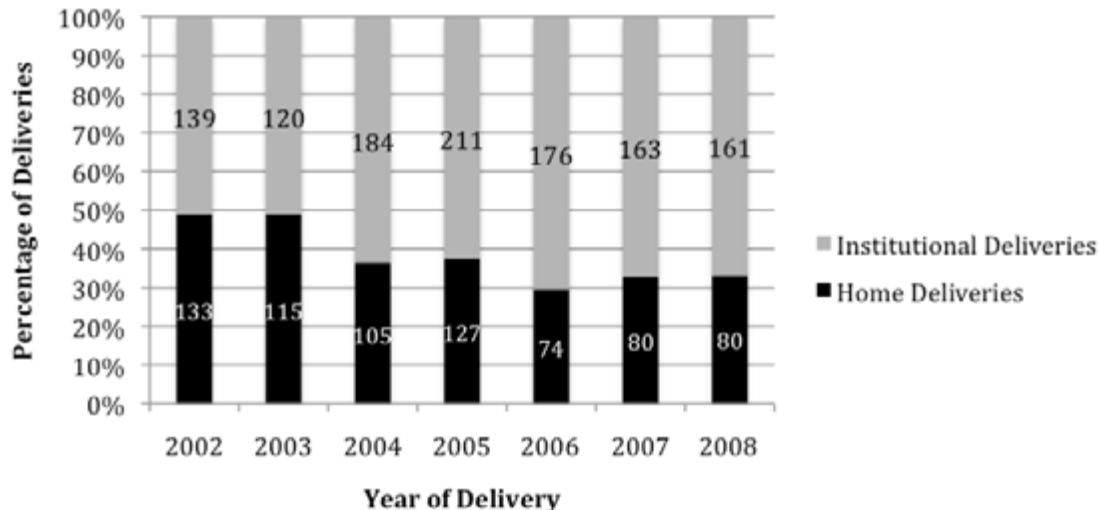

Supplement: MOESM1 [file 9491310]
